# Supplementary material
Source: publisher figshare collection journal article supplement (https://tandf.figshare.com/ndownloader/files/14057717)

**ICOP 1531388 – SUPPLEMENTARY FIGURES**

Figure S1. Charlson Comorbidity Index score according to GOLD 2017 categories

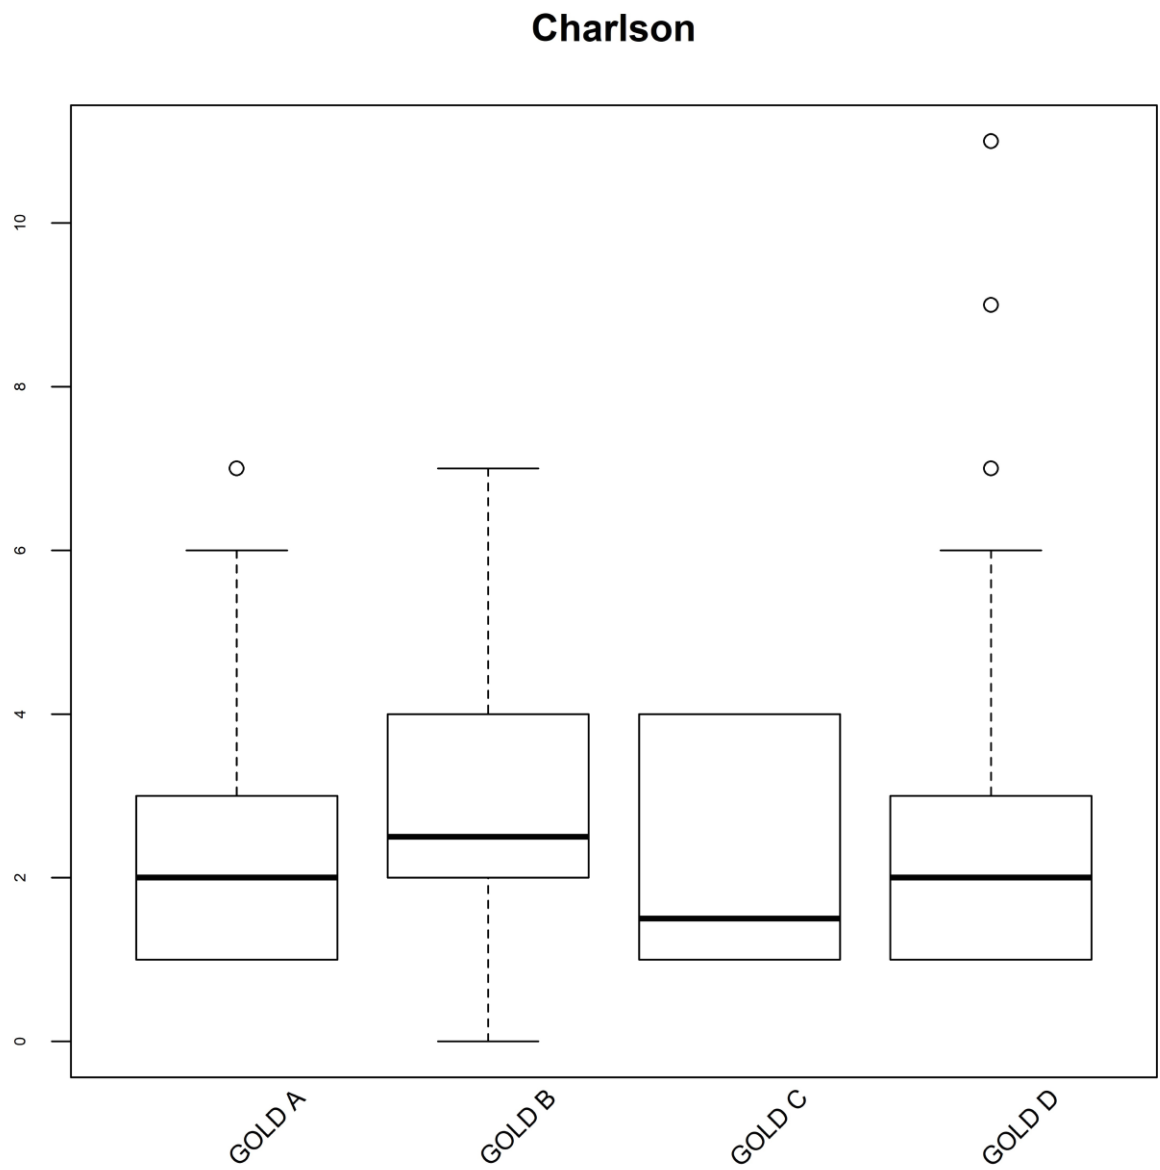

Supplement: Supplementary file 1 [file 14057717]
